# Supplementary material for: Singleton Sequence Type 382, an Emerging Clonal Group of Listeria monocytogenes Associated with Three Multistate Outbreaks Linked to Contaminated Stone Fruit, Caramel Apples, and Leafy Green Salad
Source: PubMed Central journal article supplement (PMC5328462; doi:10.1128/jcm.02140-16), 2017-02-22
Supplement: JCM.02140-16_zjm999095402s1.pdf [file JCM.02140-16_zjm999095402s1.pdf]

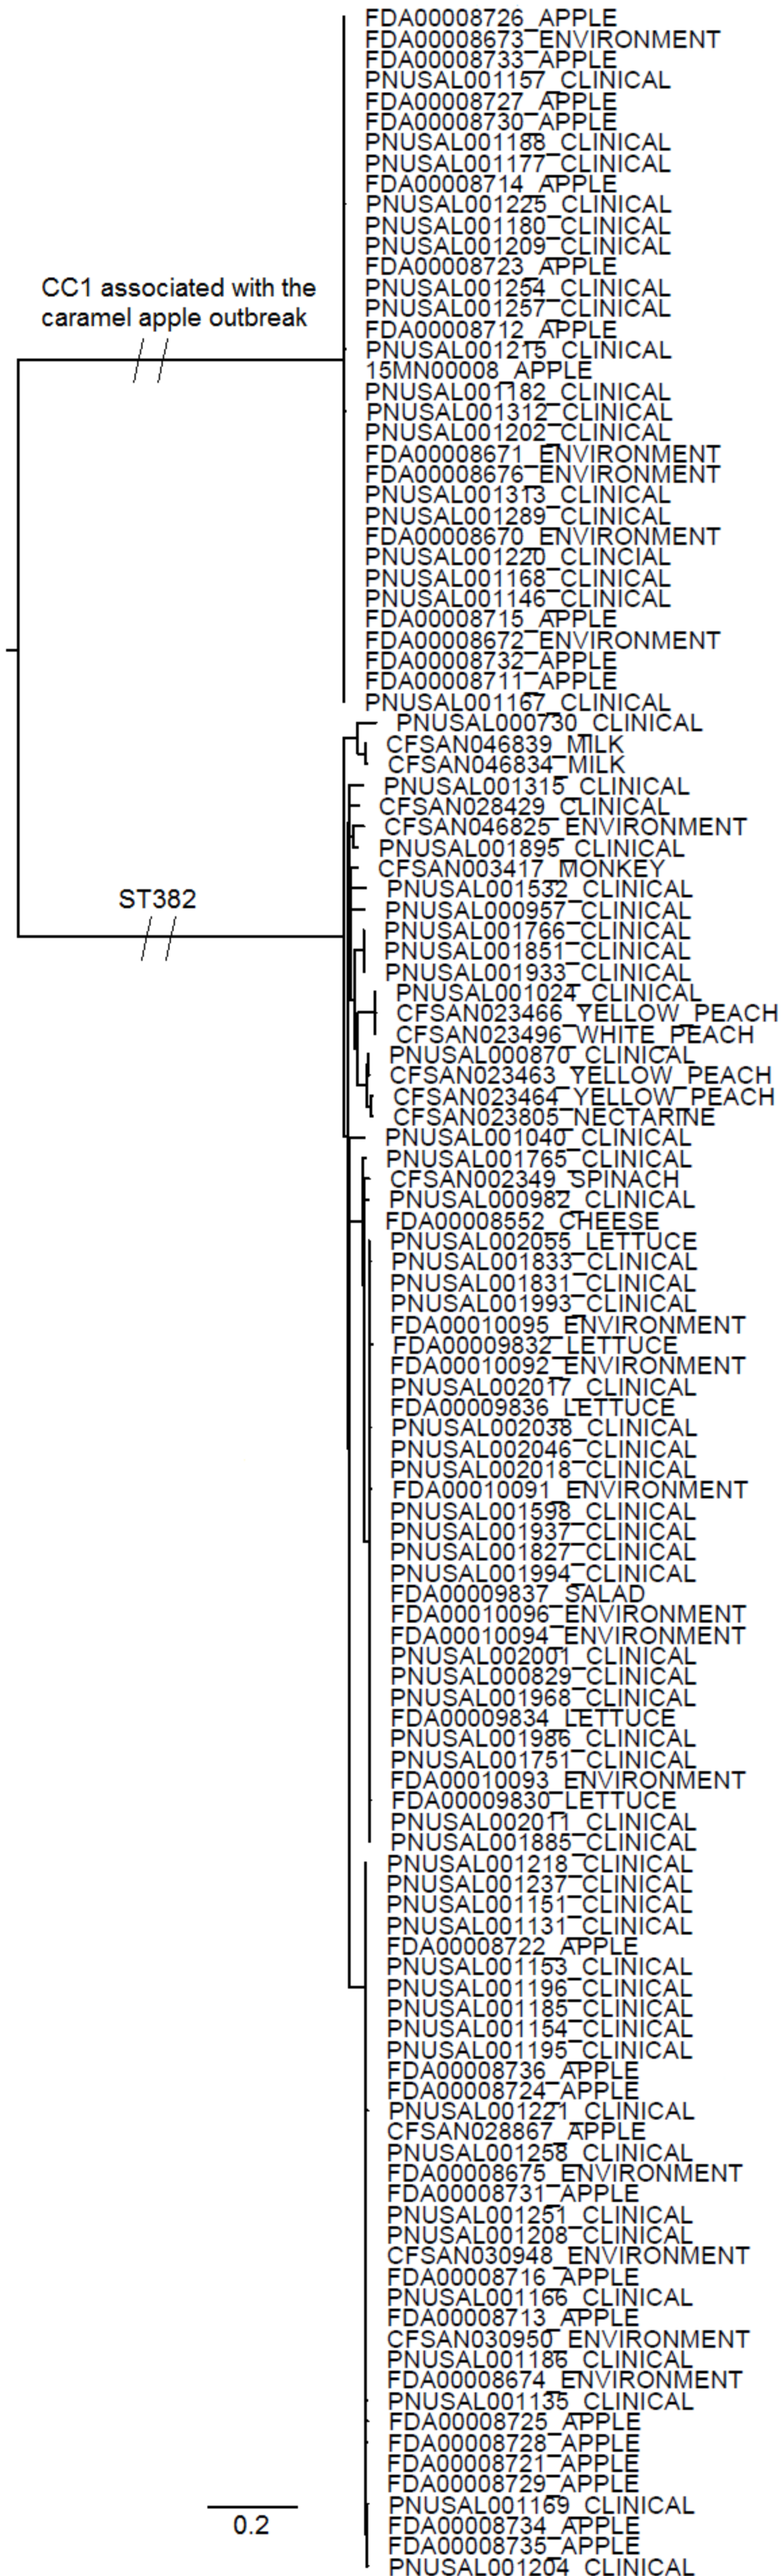

Figure S1. Phylogenetic analysis of CC1 isolates associated with the caramel apple outbreak and all ST382 isolates with CFSAN023463 as the reference. The tree uses midpoint rooting.
